# Supplementary material for: Induction of inverted morphology in brain organoids by vertical-mixing bioreactors
Source: PubMed Central journal article supplement (PMC8536773; doi:10.1038/s42003-021-02719-5), 2021-10-22
Supplement: 42003_2021_2719_MOESM3_ESM.pdf [file 42003_2021_2719_MOESM3_ESM.pdf]

## Description of Additional Supplementary Files

**File name:** Supplementary Video 1.

**Description:** Computational simulation of solid-liquid transient analysis by using a discrete phase model to compare the movement of spheres under orbital mixing.

**File name:** Supplementary Video 2.

**Description:** Computational simulation of solid-liquid transient analysis by using a discrete phase model to compare the movement of spheres under vertical mixing.

**File name:** Supplementary Data 1.

**Description:** The source data of Figure 1d and Figure 2c.
